# Supplementary material for: Convergent evolution of a parasite-encoded complement control protein-scaffold to mimic binding of mammalian TGF-β to its receptors, TβRI and TβRII
Source: PubMed Central journal article supplement (PMC9163516; doi:10.1016/j.jbc.2022.101994), 2022-04-29

## **Supporting Information**

### **Convergent evolution of a parasite-encoded complement control protein-scaffold to mimic binding of mammalian TGF- $\beta$ to its receptors, T $\beta$ RI and T $\beta$ RII**

Ananya Mukundan, Chang-Hyeock Byeon, Cynthia S. Hinck, Kyle Cunningham, Tiffany Champion, Danielle J. Smyth, Rick M. Maizels, and Andrew P. Hinck

Materials included: 5 Tables and 12 Figures

**Table S1. *H. polygyrus* constructs used in this study**

| Construct | Coding region and description (* indicates stop codon)                                                                                                                                                                                                                                                                                                                                                                                                                                                                                                                                                                                                 |
|-----------|--------------------------------------------------------------------------------------------------------------------------------------------------------------------------------------------------------------------------------------------------------------------------------------------------------------------------------------------------------------------------------------------------------------------------------------------------------------------------------------------------------------------------------------------------------------------------------------------------------------------------------------------------------|
| TGM-D1    | Residues 16-95 of <i>H. polygyrus</i> TGF- $\beta$ Mimic, NCBI MG099712<br><br>Thioredoxin-His <sub>6</sub> -Linker-Thrombin Cleavage Site-Linker-TGM-D1<br><br>MSDKIIHLTDDSFDTDVLKADGAILVDFWAEWCGPCKMIAPILDEIADEYQGKLTVAK<br>LNIDQNPQTAPKYGIRGIPTLLLFKNGEVAATKVGALSKGQLKEFLDANLAGSGSGHM<br>HHHHHHSSGLVPRGSGTGSGSGSDDSGCMPFSDEAATYKYVAKGPKNIEIPAQIDNSG<br>MYPDYTHVKRFCKGLHGEDTTGWFVVICLASQWYYYEGVQECDDR*                                                                                                                                                                                                                                               |
| TGM-D2    | Residues 96-176 of <i>H. polygyrus</i> TGF- $\beta$ Mimic, NCBI MG099712<br><br>Thioredoxin-His <sub>6</sub> -Linker-Thrombin Cleavage Site-Linker-TGM-D2<br><br>MSDKIIHLTDDSFDTDVLKADGAILVDFWAEWCGPCKMIAPILDEIADEYQGKLTVAK<br>LNIDQNPQTAPKYGIRGIPTLLLFKNGEVAATKVGALSKGQLKEFLDANLAGSGSGHM<br>HHHHHHSSGLVPRGSGTRCSPLPTNDTVSFEYLKATVNPGIIFNITVHPDASGKYELTYI<br>KRICKNFPTDSNVQGHIIIGMCYNAEWQFSSTPTCPAS*                                                                                                                                                                                                                                                   |
| TGM-D12   | Residues 16-176 of <i>H. Polygyrus</i> TGF- $\beta$ Mimic, NCBI MG099712<br><br>Thioredoxin-His <sub>6</sub> -Linker-Thrombin Cleavage Site-Linker-TGM-D12<br><br>MSDKIIHLTDDSFDTDVLKADGAILVDFWAEWCGPCKMIAPILDEIADEYQGKLTVAK<br>LNIDQNPQTAPKYGIRGIPTLLLFKNGEVAATKVGALSKGQLKEFLDANLAGSGSGHM<br>HHHHHHSSGLVPRGSGTGSGSGSDDSGCMPFSEAAATYKYVAKGPKNIEIPAQIDNSGM<br>YPDYTHVKRFCKGLHGEDTTGWFVVICLASQWYYYEGVQECDDRRCSPLPTNDTVSF<br>EYLKATVNPGIIFNITVHPDASGKYPELTYIKRICKNFP<br>TDSNVQGHIIIGMCYNAEWQFSSTPTCPAS*                                                                                                                                                   |
| TGM-D3    | Residues 177-262 of <i>H. Polygyrus</i> TGF- $\beta$ Mimic, NCBI MG099712<br><br>Thioredoxin-His <sub>6</sub> -Linker-Thrombin Cleavage Site-Linker-TGM-D3<br><br>MSDKIIHLTDDSFDTDVLKADGAILVDFWAEWCGPCKMIAPILDEIADEYQGKLTVAK<br>LNIDQNPQTAPKYGIRGIPTLLLFKNGEVAATKVGALSKGQLKEFLDANLAGSGSGHM<br>HHHHHHSSGLVPRGSGTGCPPLPDDGIVFYEYYGYAGDRHTVGPVVTKDSSGNYPSPPT<br>HARRRCRALSQEADPGEFVAICYKSGTTGESHWEYYKNIGKCPDP*                                                                                                                                                                                                                                            |
| TGM-D13   | Residues 16-262 of <i>H. Polygyrus</i> TGF- $\beta$ Mimic, NCBI MG099712<br><br>Signal Peptide-TGM-D1-D3-Linker-Myc-Linker-His <sub>6</sub><br><br>METDTLLLWVLLLWVPGSTGDAAQPARRADDSGCMFSDAATYKYVAKGPKNIEIP<br>AQIDNSGMYPDYTHVKRFCKGLHGEDTTGWFVVICLASQWYYYEGVQECDDRRCSPL<br>PTNDTVSFEYLKATVNPGIIFNITVHPDASGKYPELTYIKRICKNFPTDSNVQGHIIIGMCY<br>NAEWQFSSTPTCPASGCPPLPDDGIVFYEYYGYAGDRHTVGPVVTKDSSGNYPSPHTA<br>RRRCRALSQEADPGEFVAICYKSGTTGESHWEYYKNIGKCPDPGPEQKLISEEDLNSAV<br>DHHHHHH*                                                                                                                                                                     |
| TGM-FL    | Residues 16-422 of <i>H. Polygyrus</i> TGF- $\beta$ Mimic, NCBI MG099712<br><br>Signal Peptide-TGM-FL-Linker-Myc-Linker-His <sub>6</sub><br><br>METDTLLLWVLLLWVPGSTGDAAQPARRADDSGCMFSDAATYKYVAKGPKNIEIP<br>AQIDNSGMYPDYTHVKRFCKGLHGEDTTGWFVVICLASQWYYYEGVQECDDRRCSPL<br>PTNDTVSFEYLKATVNPGIIFNITVHPDASGKYPELTYIKRICKNFPTDSNVQGHIIIGMCY<br>NAEWQFSSTPTCPASGCPPLPDDGIVFYEYYGYAGDRHTVGPVVTKDSSGNYPSPHTA<br>RRRCRALSQEADPGEFVAICYKSGTTGESHWEYYKNIGKCPDPCKPLEANESVHYEY<br>FTMTNETDKKKGPPAKVKGSGKYPEHTCVKKVCSKWPYTCSTGGPIFGECIGATWNFT<br>ALMECINARGCSSDDLFDKLGFEKVIVRKGEGSDSYKDDFARFYATGSKVIAECGGKT<br>VRLECSNGEWHEPGTKTVHRCTKDGIRTLGPEQKLISEEDLNSAVDHHHHHH* |

**Table S2. TGM:TβRI and TGM:TβRII binding as assessed by ITC**

| Cell Syringe                   | TβRI TGM-D1     | TβRI TGM-D2                     | TβRI TGM-D3     | TβRI TGM-D1D2                | TβRI TGM-FL                  | TβRII TGM-D1    | TβRII TGM-D2    | TβRII TGM-D3                   | TβRII TGM-FL                   |
|--------------------------------|-----------------|---------------------------------|-----------------|------------------------------|------------------------------|-----------------|-----------------|--------------------------------|--------------------------------|
| Cell concentration (μM)        | 7.5             | 7.5                             | 7.5             | 7.5                          | 7.5                          | 15              | 15              | 15                             | 15                             |
| Syringe concentration (μM)     | 150             | 150                             | 135             | 100                          | 58                           | 300             | 300             | 300                            | 320                            |
| Temperature (°C)               | 25              | 25                              | 25              | 25                           | 25                           | 35              | 35              | 35                             | 35                             |
| K <sub>D</sub> (nM)            | ND <sup>a</sup> | 1500 (500 – 4600) <sup>bc</sup> | ND <sup>a</sup> | 25 (11, 48) <sup>bc</sup>    | 52 (29 – 90) <sup>bc</sup>   | ND <sup>a</sup> | ND <sup>a</sup> | 1200 (900, 1500) <sup>bd</sup> | 550 (260, 1080) <sup>bc</sup>  |
| ΔH (kcal mol <sup>-1</sup> )   | ND <sup>a</sup> | -18 (-27 – -13) <sup>b</sup>    | ND <sup>a</sup> | -19 (-20 – -18) <sup>b</sup> | -17 (-18 – -15) <sup>b</sup> | ND <sup>a</sup> | ND <sup>a</sup> | -11 (-11, -10) <sup>b</sup>    | -7.1 (-7.9, -6.6) <sup>b</sup> |
| ΔG (kcal mol <sup>-1</sup> )   | ND <sup>a</sup> | -8.0                            | ND <sup>a</sup> | -11                          | -9.9                         | ND <sup>a</sup> | ND <sup>a</sup> | -8.4                           | -8.8                           |
| -TΔS (kcal mol <sup>-1</sup> ) | ND <sup>a</sup> | 9.7                             | ND <sup>a</sup> | 8.3                          | 6.8                          | ND <sup>a</sup> | ND <sup>a</sup> | 2.4                            | -1.7                           |
| Stoichiometry (n)              | ND <sup>a</sup> | 0.54 <sup>f</sup>               | ND <sup>a</sup> | 1.2 <sup>f</sup>             | 0.96 <sup>f</sup>            | ND <sup>a</sup> | ND <sup>a</sup> | 1.1 <sup>f</sup>               | 0.84 <sup>f</sup>              |

<sup>a</sup>Not determined due to weak signal

<sup>b</sup>Uncertainty reported as 68.3% confidence interval

<sup>c</sup>Fit for one replicate

<sup>d</sup>Global fit of three replicates

<sup>e</sup>Global fit of two replicates

<sup>f</sup>Number of sites determined by incompetent fraction value on sedphat; set to '1' for K<sub>D</sub> analysis

**Table S3. ITC-based TβRI and TβRII competition binding**

| Cell                           | TβRI                            | TβRI                           | TβRII                              |
|--------------------------------|---------------------------------|--------------------------------|------------------------------------|
| Syringe                        | TGF-β(TβRII) <sub>2</sub>       | TGM-D1D2                       | mmTGF-β27M                         |
| Competitor <sup>a</sup>        | None                            | 6 μM TGF-β(TβRII) <sub>2</sub> | 0, 6.0, or 12.0 μM TGM-D3          |
| Cell concentration (μM)        | 5                               | 10                             | 15                                 |
| Syringe concentration (μM)     | 100                             | 110                            | 150                                |
| Temperature (°C)               | 30                              | 25                             | 35                                 |
| K <sub>D</sub> (nM)            | 61 (36 - 97) <sup>d</sup>       | ND <sup>b</sup>                | 35 (17 - 64) <sup>c, d</sup>       |
| ΔH (kcal mol <sup>-1</sup> )   | -4.2 (-4.5 - -4.0) <sup>d</sup> | ND <sup>b</sup>                | -7.4 (-7.7 - -7.0) <sup>c, d</sup> |
| ΔG (kcal mol <sup>-1</sup> )   | -10                             | ND <sup>b</sup>                | -11 <sup>e</sup>                   |
| -TΔS (kcal mol <sup>-1</sup> ) | -5.8                            | ND <sup>b</sup>                | -3.2 <sup>e</sup>                  |

<sup>a</sup>Competitor was added to the sample cell

<sup>b</sup>K<sub>D</sub>, ΔH, ΔG and -TΔS were unable to be fitted

<sup>c</sup>K<sub>D</sub> and ΔH correspond to the parameters, derived from the global fit, for TβRII:mmTGF-β27M binding in the absence of competitor, uncertainty determined by 68.3% confidence interval

<sup>d</sup>Fit for one replicate

<sup>e</sup>ΔG and -TΔS correspond to those for TβRII:mmTGF-β27M binding in the absence of competitor calculated from ΔG = ΔH - TΔS and globally fitted values for K<sub>D</sub> and ΔH

**Table S4. TGM-D3 Structural Statistics**

|                                             |                   |
|---------------------------------------------|-------------------|
| <b>NOE</b>                                  |                   |
| Intramolecular NOE: $i-j = 0$               | 465               |
| Sequential NOE: $i-j = 1$                   | 323               |
| Short-Range NOE: $1 < i-j < 5$              | 104               |
| Long-Range: $i-j \geq 5$                    | 247               |
| <b>Angle</b>                                |                   |
| TALOS ( $\phi, \psi$ ) dihedral constraints | 120               |
| $^3J_{\text{HNHA}\alpha}$                   | 39                |
| <b>RDC</b>                                  | 12                |
| RDC: N-H                                    | 69                |
| RDC: $\text{H}\alpha\text{-C}\alpha$        | 74                |
| RDC: $\text{C}\alpha\text{-CO}$             | 66                |
| <b>RMSD (Deviations)</b>                    |                   |
| Bonds ( $\text{\AA}$ )                      | $0.008 \pm 0.000$ |
| Impropers ( $^\circ$ )                      | $1.067 \pm 0.159$ |
| Angles ( $^\circ$ )                         | $1.032 \pm 0.035$ |
| Dihedral ( $^\circ$ )                       | $4.171 \pm 0.441$ |
| HBDA ( $\text{\AA}$ )                       | $0.025 \pm 0.009$ |
| $^3J_{\text{HNHA}\alpha}$ (Hz)              | $1.349 \pm 0.092$ |
| <b>Ramachandran<sup>a</sup></b>             |                   |
| Most Favored                                | 81.2%             |
| Additionally Allowed                        | 11.6%             |
| Generously Allowed                          | 5.8%              |
| Disallowed                                  | 1.4%              |
| <b>RMSD<sup>b</sup></b>                     |                   |
| <u>Secondary Structure<sup>c</sup></u>      |                   |
| Backbone                                    | 0.68 $\text{\AA}$ |
| Heavy                                       | 1.14 $\text{\AA}$ |
| <u>Core<sup>d</sup></u>                     |                   |
| Backbone                                    | 1.00 $\text{\AA}$ |
| Heavy                                       | 1.48 $\text{\AA}$ |

<sup>a</sup>Ramachandran values from the ten lowest-energy structures

<sup>b</sup>RMSD values are computed from a mean structure

<sup>c</sup>Residues 17-21, 45-49, 56-58, 62-69, 76-80

<sup>d</sup>Residues 6-81

**Table S5. WT TGM-D3:TβRII variant and WT TβRII:TGM-D3 variant binding as assessed by SPR**

| Surface | Analyte   | Fitted Parameters <sup>a</sup>                    |                                      |                                  |                       |
|---------|-----------|---------------------------------------------------|--------------------------------------|----------------------------------|-----------------------|
|         |           | $k_{\text{on}}$ ( $\text{M}^{-1} \text{s}^{-1}$ ) | $k_{\text{off}}$ ( $\text{s}^{-1}$ ) | $K_{\text{d}}$ ( $\mu\text{M}$ ) | $R_{\text{max}}$ (RU) |
| TGM-D3  | WT TβRII  | $(4.1 \pm 0.1) \times 10^5$                       | $0.7 \pm 0.1$                        | $1.6 \pm 0.1$                    | $240 \pm 10$          |
| TGM-D3  | D55N      | $(5.0 \pm 0.2) \times 10^4$                       | $3.1 \pm 0.1$                        | $63 \pm 1$                       | $200 \pm 10$          |
| TGM-D3  | I73A      | $(1.6 \pm 0.1) \times 10^5$                       | $1.1 \pm 0.1$                        | $6.9 \pm 0.1$                    | $220 \pm 10$          |
| TGM-D3  | S75L      | $(1.3 \pm 0.1) \times 10^4$                       | $3.9 \pm 0.9$                        | $310 \pm 30$                     | $250 \pm 20$          |
| TGM-D3  | I76A      | $(4.7 \pm 0.1) \times 10^4$                       | $1.2 \pm 0.1$                        | $26 \pm 1$                       | $430 \pm 10$          |
| TGM-D3  | E142Q     | $(4.1 \pm 0.1) \times 10^5$                       | $10 \pm 10$                          | $17 \pm 1$                       | $130 \pm 10$          |
| TβRII   | WT TGM-D3 | $(1.6 \pm 0.1) \times 10^5$                       | $0.26 \pm 0.01$                      | $1.6 \pm 0.1$                    | $120 \pm 10$          |
| TβRII   | R198A     | $(1.1 \pm 0.1) \times 10^5$                       | $0.78 \pm 0.01$                      | $70 \pm 1$                       | $260 \pm 10$          |
| TβRII   | H199A     | $(3.3 \pm 0.1) \times 10^5$                       | $0.98 \pm 0.01$                      | $3.0 \pm 0.1$                    | $310 \pm 10$          |
| TβRII   | F235A     | $(4.5 \pm 0.1) \times 10^5$                       | $1.8 \pm 0.2$                        | $4.1 \pm 0.1$                    | $63 \pm 1$            |
| TβRII   | V236A     | $(3.8 \pm 0.1) \times 10^5$                       | $1.8 \pm 0.1$                        | $4.6 \pm 0.1$                    | $84 \pm 1$            |
| TβRII   | I238A     | $(9.4 \pm 0.1) \times 10^4$                       | $2.3 \pm 0.1$                        | $25 \pm 1$                       | $140 \pm 10$          |
| TβRII   | Y252A     | $(7.8 \pm 0.2) \times 10^4$                       | $1.7 \pm 0.1$                        | $21 \pm 1$                       | $150 \pm 10$          |
| TβRII   | Y253A     | ND <sup>b</sup>                                   | ND <sup>b</sup>                      | ND <sup>b</sup>                  | ND <sup>b</sup>       |
| TβRII   | K254A     | $(3 \pm 2) \times 10^5$                           | $12 \pm 6$                           | $35 \pm 1$                       | $310 \pm 10$          |
| TβRII   | N255A     | $(4.8 \pm 0.1) \times 10^5$                       | $1.3 \pm 0.1$                        | $2.7 \pm 0.1$                    | $150 \pm 10$          |
| TβRII   | I256A     | $(8.8 \pm 0.1) \times 10^5$                       | $1.4 \pm 0.1$                        | $1.6 \pm 0.1$                    | $130 \pm 10$          |
| TβRII   | K258A     | $(4.3 \pm 0.1) \times 10^5$                       | $1.2 \pm 0.1$                        | $2.7 \pm 0.1$                    | $250 \pm 10$          |

<sup>a</sup>Fitted parameters were derived from kinetic analysis of a duplicate or triplicate injection series

<sup>b</sup>Not determined due to weak signal

<sup>a</sup>Not determined due to weak signal

**Figure S1: ITC thermograms for TGM binding to T $\beta$ RI and T $\beta$ RII. A-E.** Raw thermograms for the injection of (A) TGM-D2, (B) TGM-D12, or (C) TGM-FL into T $\beta$ RI, and (D) TGM-D3 or (E) TGM-FL into T $\beta$ RII. **F-G, J-K.** Raw thermograms for the injection of (F) TGM-D1 or (G) TGM-D3 into T $\beta$ RI, with corresponding integrated heats (J and K, respectively). **H-I, L-M.** Raw thermograms for the injection of (H) TGM-D1 or (I) TGM-D2 into T $\beta$ RII, with corresponding integrated heats (L and M, respectively).

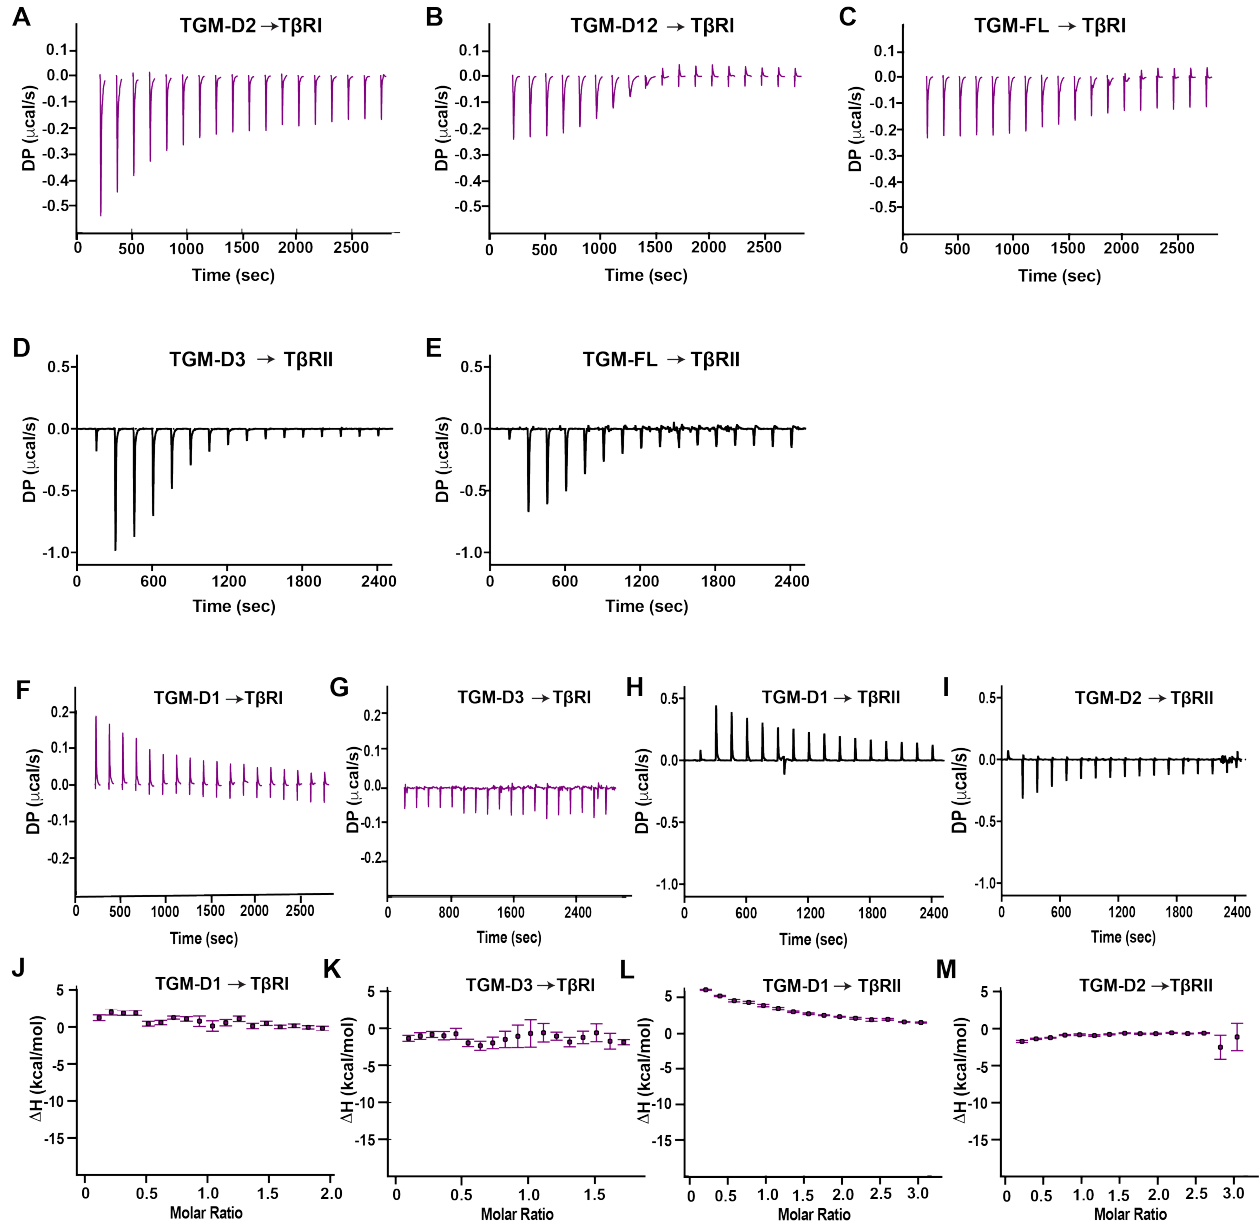

**Figure S2.  $^1\text{H}$ - $^{15}\text{N}$  HSQC spectra of TGM-D2 and TGM-D3.** A-B.  $^1\text{H}$ - $^{15}\text{N}$  HSQC spectrum of  $^{15}\text{N}$  TGM-D2 (A). Blue boxes mark doubled peaks in dynamic equilibrium with one another as identified by a ZZ-exchange HSQC experiment (expansion of ZZ-exchange HSQC spectrum with a mixing time of 250 ms is shown as an inset for two pairs of peaks). Peak expansion corresponding to ZZ-exchange HSQC experiment as a function of the mixing time is shown for the pair of peaks at  $^1\text{H}$  10.3 ppm/ $^{15}\text{N}$  124 ppm (B). C.  $^1\text{H}$ - $^{15}\text{N}$  HSQC spectrum of  $^{15}\text{N}$  TGM-D3. All spectra recorded in 25 mM sodium phosphate, 50 mM sodium chloride, 5%  $^2\text{H}_2\text{O}$  pH 6.0, 310 K.

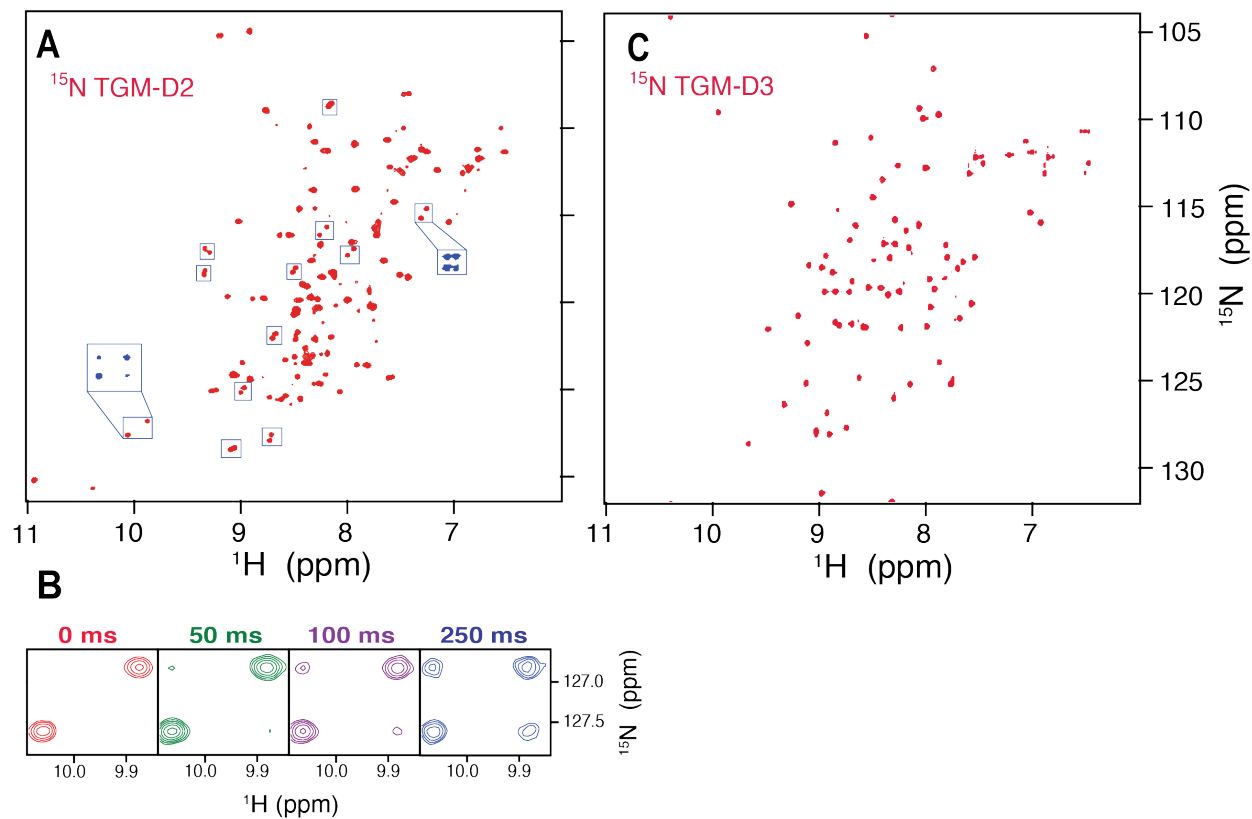



**Figure S3.  $^1\text{H}$ - $^{15}\text{N}$  HSQC spectra of TGM-D1.** **A.**  $^1\text{H}$ - $^{15}\text{N}$  HSQC spectrum of 100  $\mu\text{M}$   $^{15}\text{N}$  TGM-D1 in 25 mM sodium phosphate, 250 mM sodium chloride, 5%  $^2\text{H}_2\text{O}$  pH 6.0, 310 K (A). **B-D.**  $^1\text{H}$ - $^{15}\text{N}$  HSQC spectrum of 200  $\mu\text{M}$   $^{15}\text{N}$  TGM-D1 in the same buffer as panel A, but with a protein concentration of 200  $\mu\text{M}$  and with 10 mM CHAPS added (B), a protein concentration of 20  $\mu\text{M}$   $^{15}\text{N}$  TGM-D1 but no CHAPs (C), or a protein concentration of 20  $\mu\text{M}$  and with 10 mM CHAPS added (D).

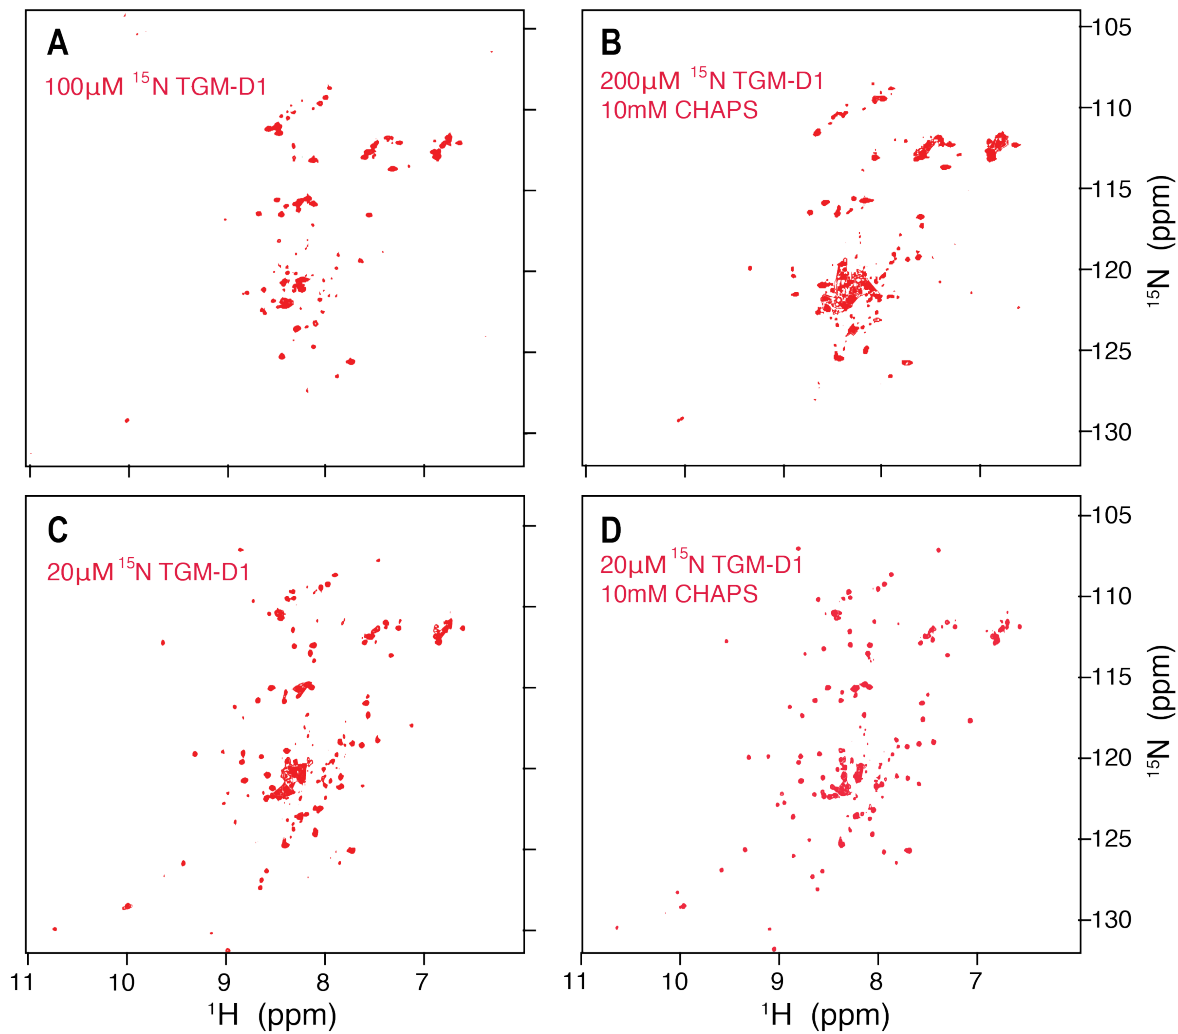

**Figure S4. Binding of TGM domains by TβRI.** A-B.  $^1\text{H}$ - $^{15}\text{N}$  HSQC spectra of TGM-D1 alone (red) or with 1.2 molar equivalents of unlabeled TβRI (blue) (A).  $^1\text{H}$ - $^{15}\text{N}$  HSQC spectra of TGM-D3 alone (red) or with 1.2 molar equivalents of unlabeled TβRI (blue) (B). C-D.  $^1\text{H}$ - $^{15}\text{N}$  HSQC spectra of TGM-D2 alone (C) or with 1.2 molar equivalents of unlabeled TβRI (D). The boxed regions on the spectra mark peaks in conformational exchange (C) or resolved into a single peak by TβRI binding (D). All spectra recorded in 25 mM sodium phosphate, 50 mM sodium chloride, 5%  $^2\text{H}_2\text{O}$  pH 6.0, 310 K.

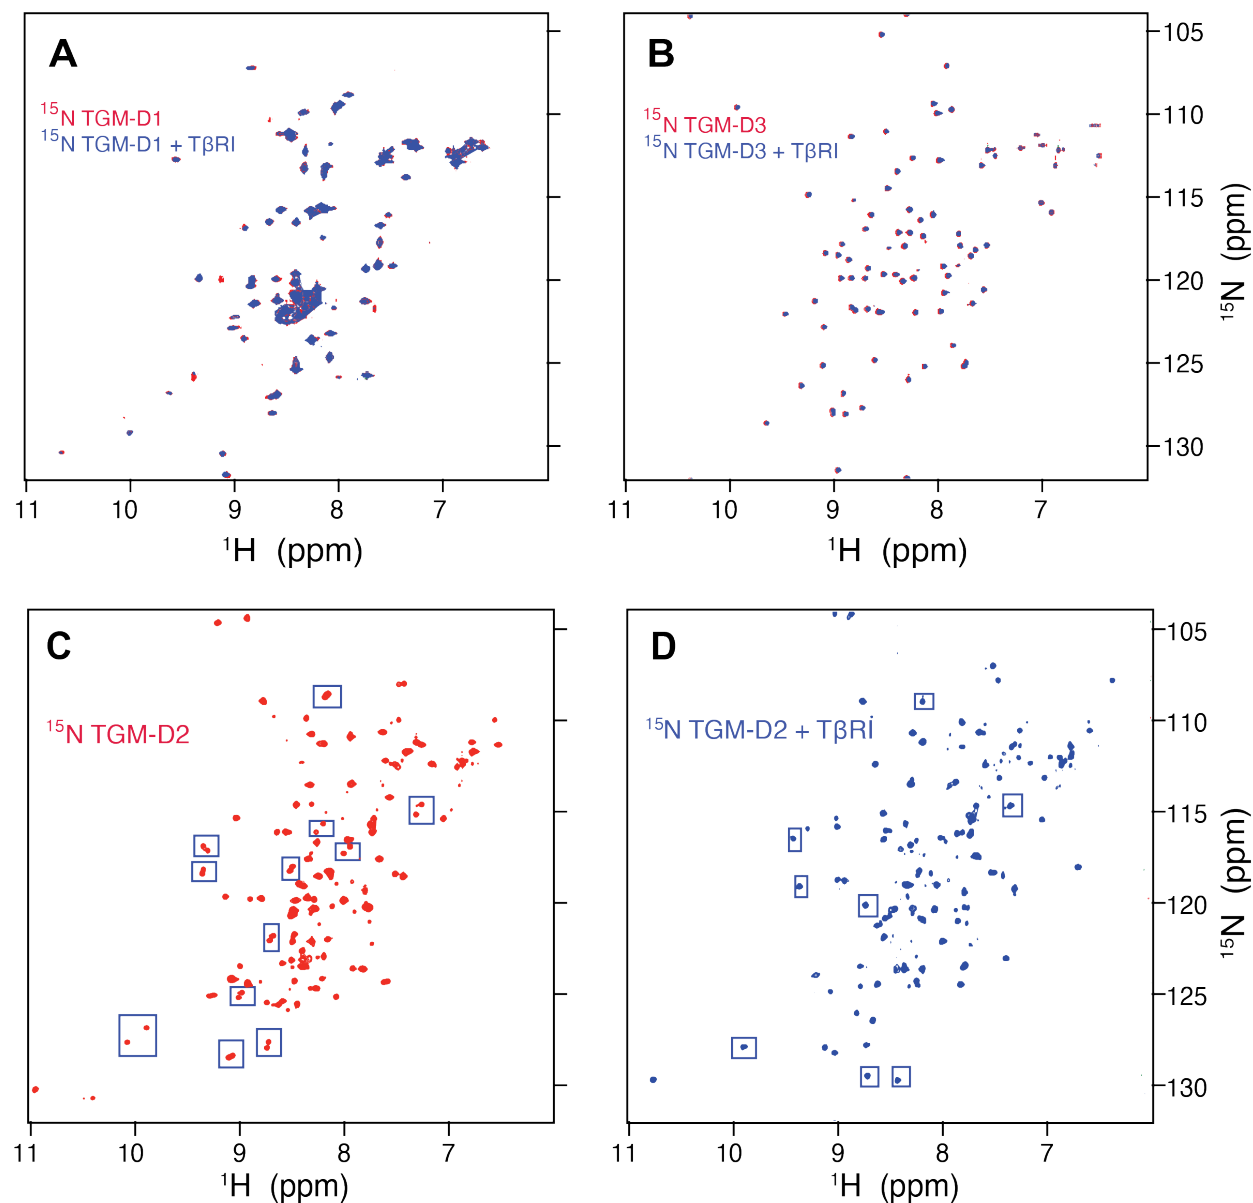

**Figure S5. Binding of  $^{15}\text{N}$  T $\beta$ RI by TGM-D1, TGM-D2, and TGM-D3.** A-B.  $^1\text{H}$ - $^{15}\text{N}$  HSQC spectra 0.03 mM  $^{15}\text{N}$  T $\beta$ RI alone (red) overlaid with the spectrum of the same sample but with 1.5 molar equivalents of unlabeled TGM-D2 (A) or TGM-D3 (B) added (blue). Expansion of boxed region in panel A at intermediate titration points is shown below panel A. C.  $^1\text{H}$ - $^{15}\text{N}$  HSQC spectrum of 0.03 mM  $^{15}\text{N}$  T $\beta$ RI alone (red) overlaid with the spectrum of the same sample but with 1.5 molar equivalents of unlabeled TGM-D1 added. The boxed inset at the top of panel C shows a plot of the intensity ratios ( $I_{\text{TGM-D1-bound}}/I_{\text{free}}$ ) per residue of T $\beta$ RI. The red dots on the baseline indicate residues that completely disappeared upon addition of TGM-D1 to  $^{15}\text{N}$  T $\beta$ RI. Boxed residues in the HSQC of panel C indicate residues of T $\beta$ RI that undergo a chemical shift upon addition of titrating amounts of TGM-D1. Spectra recorded in 25 mM sodium phosphate, 50 mM sodium chloride, 5%  $^2\text{H}_2\text{O}$  pH 6.0, 310 K.

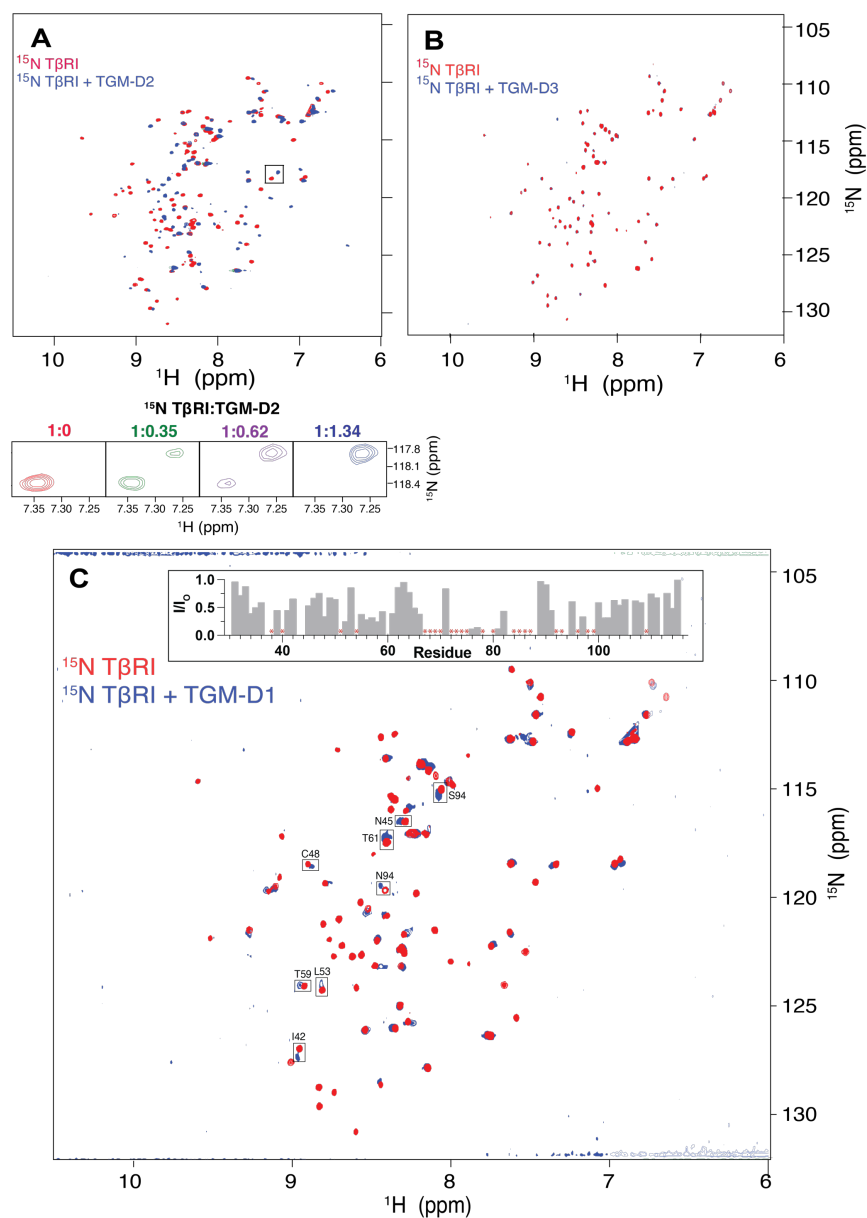

**Figure S6.  $^1\text{H}$ - $^{15}\text{N}$  HSQC assignments of T $\beta$ RI alone and bound to TGM-D2. A.**  $^1\text{H}$ - $^{15}\text{N}$  HSQC spectra of T $\beta$ RI alone with peaks assigned. **B.**  $^1\text{H}$ - $^{15}\text{N}$  HSQC spectra of T $\beta$ RI bound to TGM-D2 with peaks assigned. Dashed horizontal lines in panel A indicate sidechain  $-\text{NH}_2$  resonances of Asn/Gln residues. Spectra recorded in 25 mM HEPES, 50 mM sodium chloride, 0.02% azide, 5%  $^2\text{H}_2\text{O}$  pH 6.0, 300K.

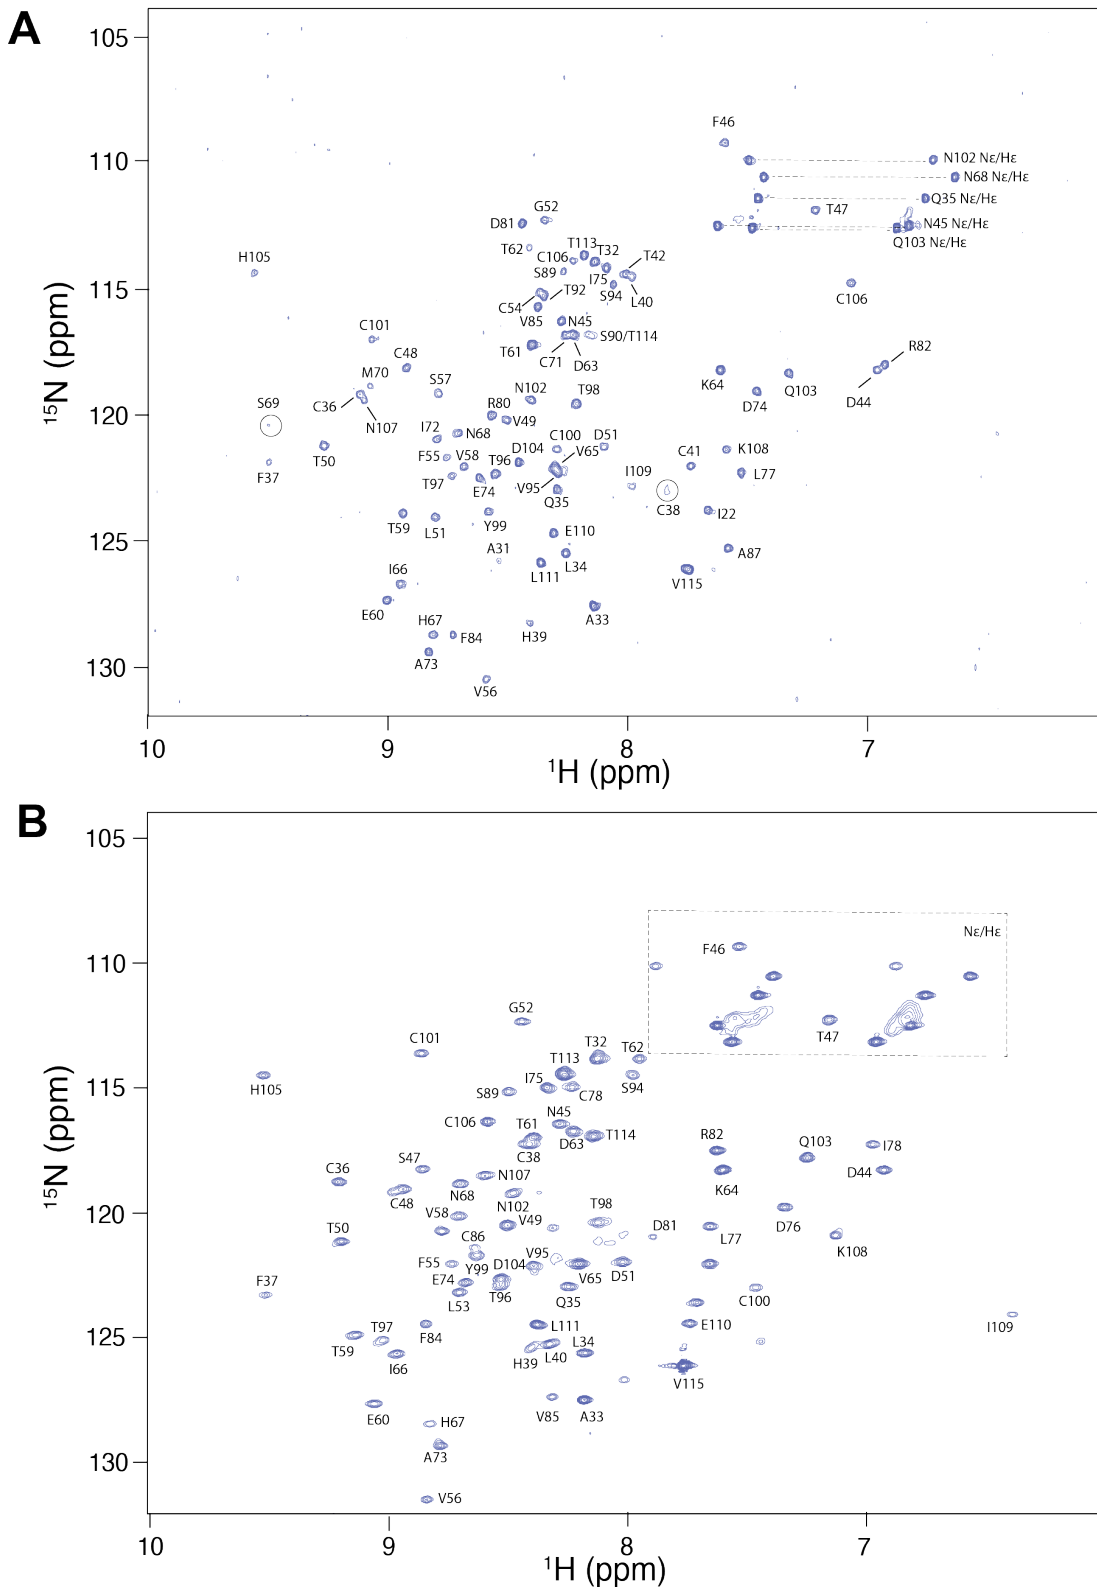

**Figure S7. Binding of TGM-D1, TGM-D2, and TGM-D3 by TβRII. A-B.**  $^1\text{H}$ - $^{15}\text{N}$  HSQC spectra of TGM-D1 (A) or TGM-D2 (B) alone (red) overlaid with the spectrum of the same sample but with 1.2 equivalents of unlabeled TβRII added (blue). **C-E.**  $^1\text{H}$ - $^{15}\text{N}$  HSQC spectra of 0.03 mM  $^{15}\text{N}$  TβRII alone (red) overlaid with the spectrum of the same sample, but with 1.2 equivalents of unlabeled TGM-D1 (C), TGM-D2 (D), or TGM-D3 (E) added (blue). Expansion of boxed region in panel E at intermediate titration points is shown below panel E. Spectra recorded in 25 mM sodium phosphate, 50 mM sodium chloride, 5%  $^2\text{H}_2\text{O}$  pH 6.0, 310 K.

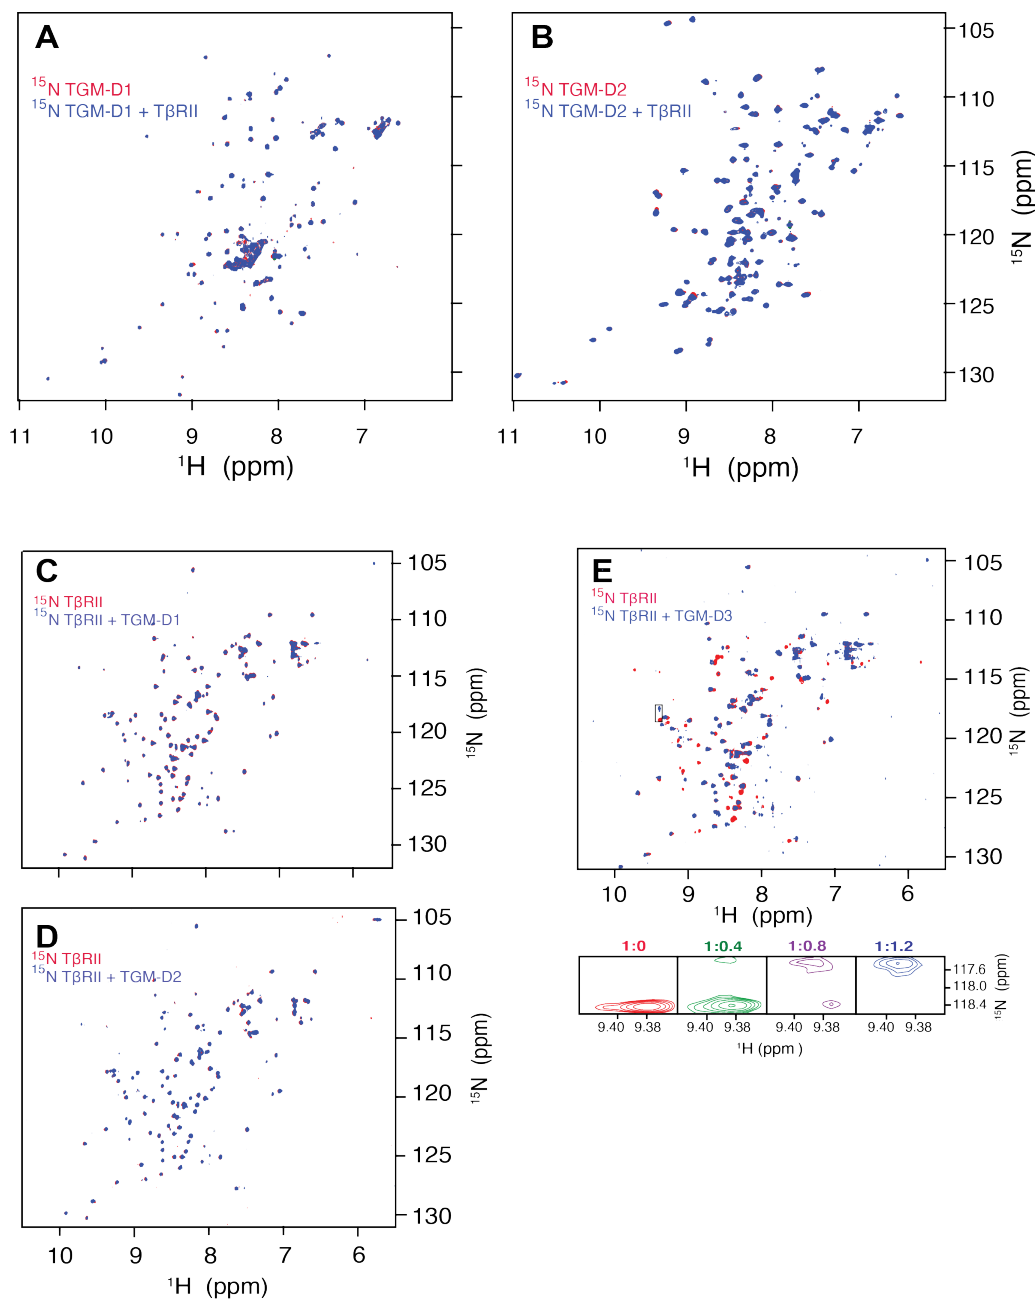

**Figure S8.  $^1\text{H}$ - $^{15}\text{N}$  HSQC assignments of T $\beta$ R $\text{II}$  alone and as bound to TGM-D3. A.  $^1\text{H}$ - $^{15}\text{N}$  HSQC spectra of T $\beta$ R $\text{II}$  alone with peaks assigned. B.  $^1\text{H}$ - $^{15}\text{N}$  HSQC spectra of T $\beta$ R $\text{II}$  bound to TGM-D3 with peaks assigned. Dashed horizontal lines indicate sidechain  $-\text{NH}_2$  resonances of Asn/Gln residues. Spectra recorded in 25 mM sodium phosphate, 50 mM sodium chloride, 5%  $^2\text{H}_2\text{O}$  pH 6.0, 310K.**

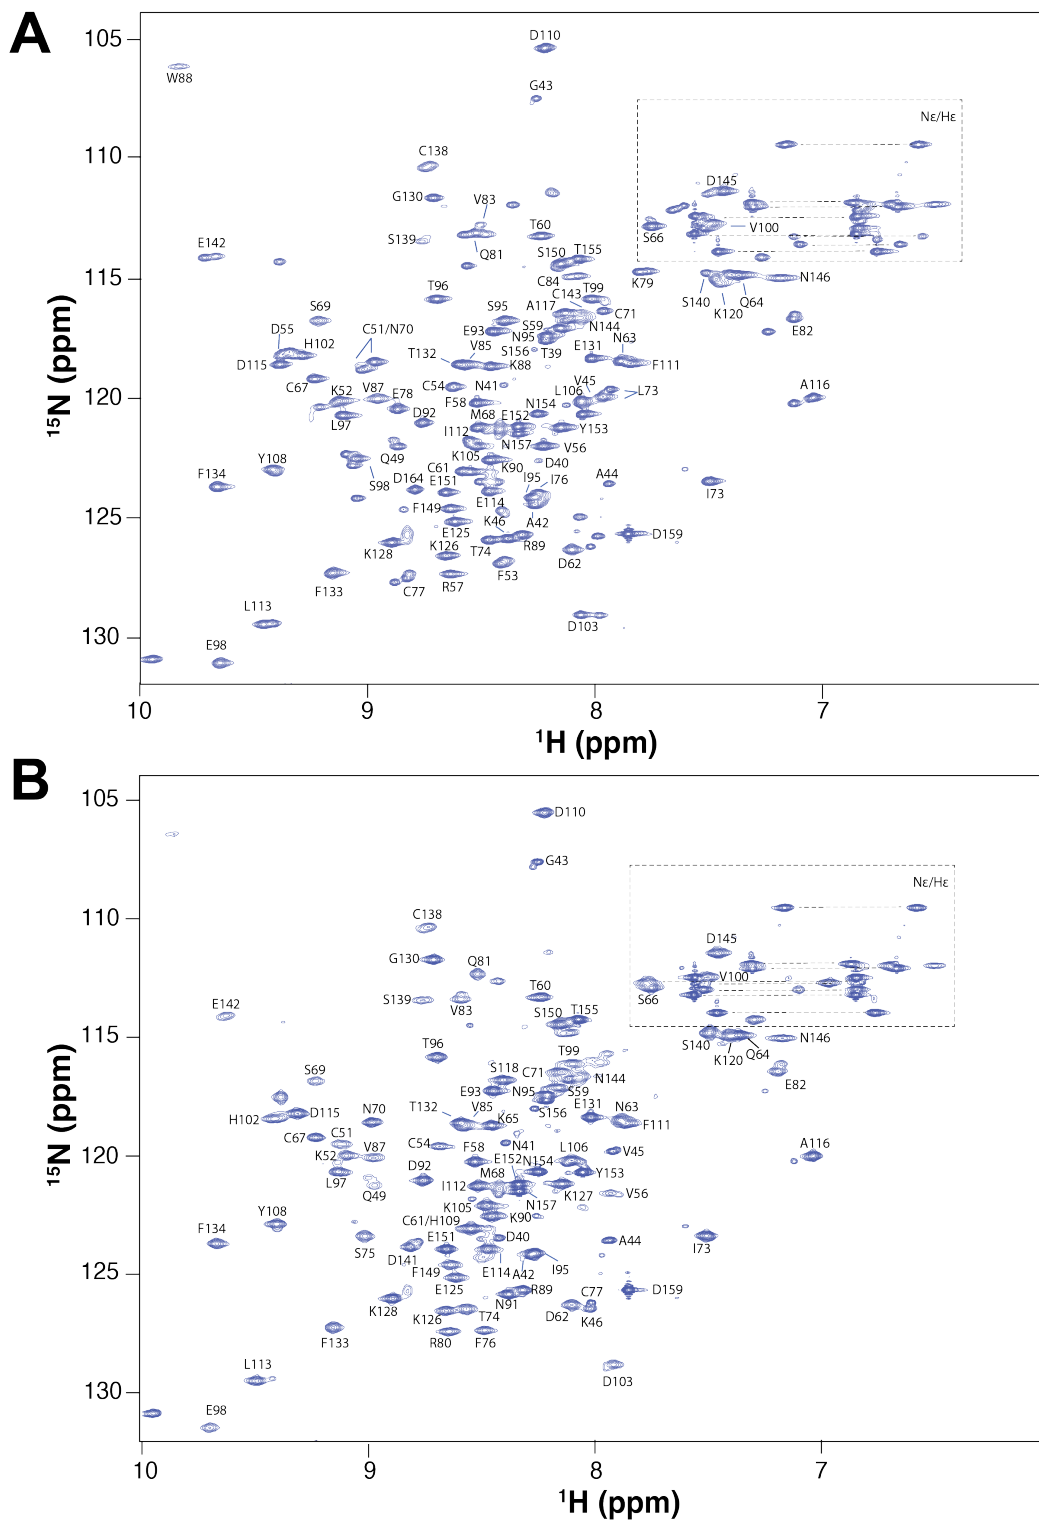

**Figure S9.  $^1\text{H}$ - $^{15}\text{N}$  HSQC assignments of TGM-D3 alone and bound to T $\beta$ RIL. A-B.  $^1\text{H}$ - $^{15}\text{N}$  HSQC spectra of TGM-D3 alone (A) or bound to T $\beta$ RIL (B) with peaks assigned. Dashed horizontal lines indicate sidechain  $-\text{NH}_2$  resonances of Asn/Gln residues.**

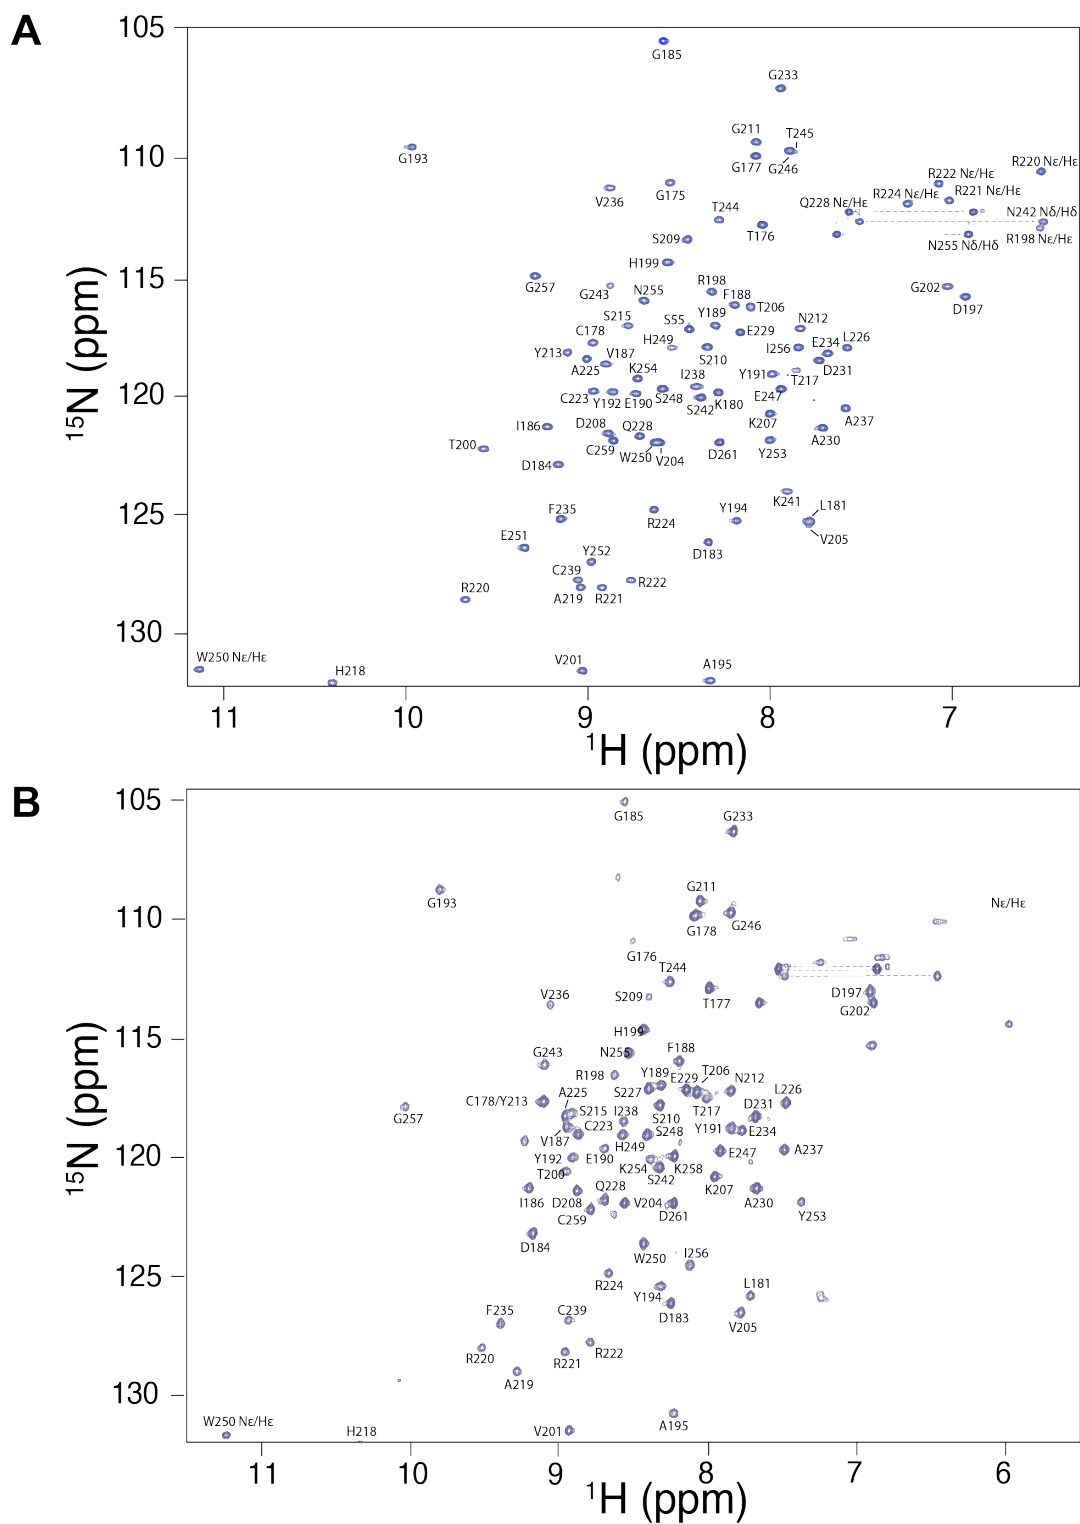

**Figure S10:  $^1\text{H}$  NMR spectra of TGM-D3 and T $\beta$ RII single amino acid variants. A.**  $^1\text{H}$  NMR spectra of amide region (left) and methyl region (right) of TGM-D3 variants as compared to wild-type TGM-D3. **B.**  $^1\text{H}$  NMR spectra of amide region (left) and methyl region (right) of T $\beta$ RII variants as compared to wild-type T $\beta$ RII. Spectra were collected in 25mM  $\text{Na}_2\text{HPO}_4$ , 150 mM NaCl, 0.02%  $\text{NaN}_3$ , pH 7.4 298K.

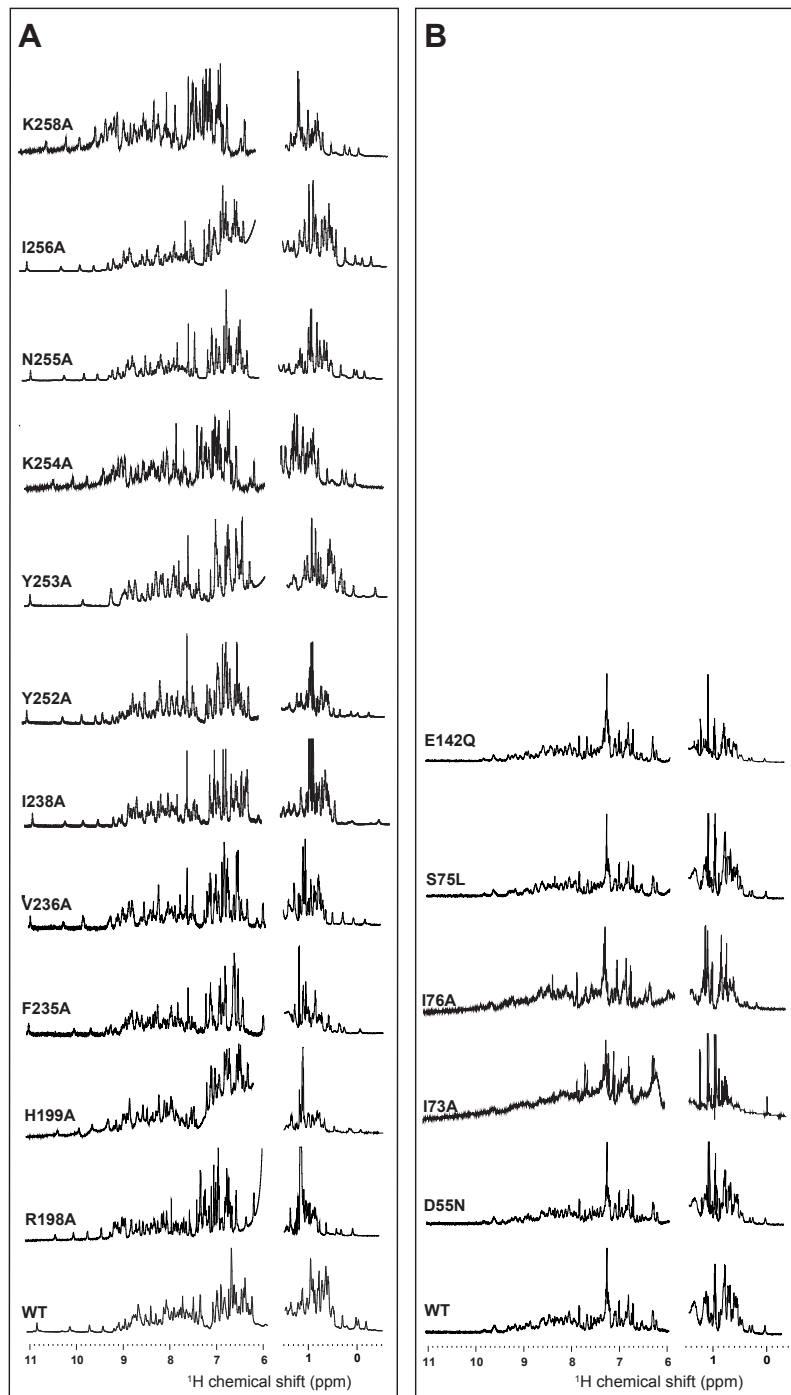



**Figure S11. Binding of TβRII and TGM-D3 variants to their wild type counterparts. A-H.** SPR sensorgrams obtained upon injection of TGM-D3 Arg<sup>198</sup>Ala (A), His<sup>199</sup>Ala (B), Phe<sup>235</sup>Ala (C), Val<sup>236</sup>Ala (D), Lys<sup>254</sup>Ala (E), Asn<sup>255</sup>Ala (F), Ile<sup>256</sup>Ala (G), and Lys<sup>258</sup>Ala(H), over immobilized TβRII. **I-N.** SPR sensorgrams obtained upon injection of TβRII WT (I), Asp<sup>55</sup>Asn (J), Ile<sup>73</sup>Ala (K), Ser<sup>75</sup>Leu (L), Ile<sup>76</sup>Ala (M), and Glu<sup>142</sup>Gln (N) over immobilized TGM-D3. Sensorgrams, obtained upon injection of a two-fold duplicate or triplicate dilution series of each construct are shown in black. Global fit of the sensorgrams to a 1:1 binding model are shown in orange. Black bars shown above the sensorgrams specify the injection period. Concentrations used and dissociation constants shown in the lower right.

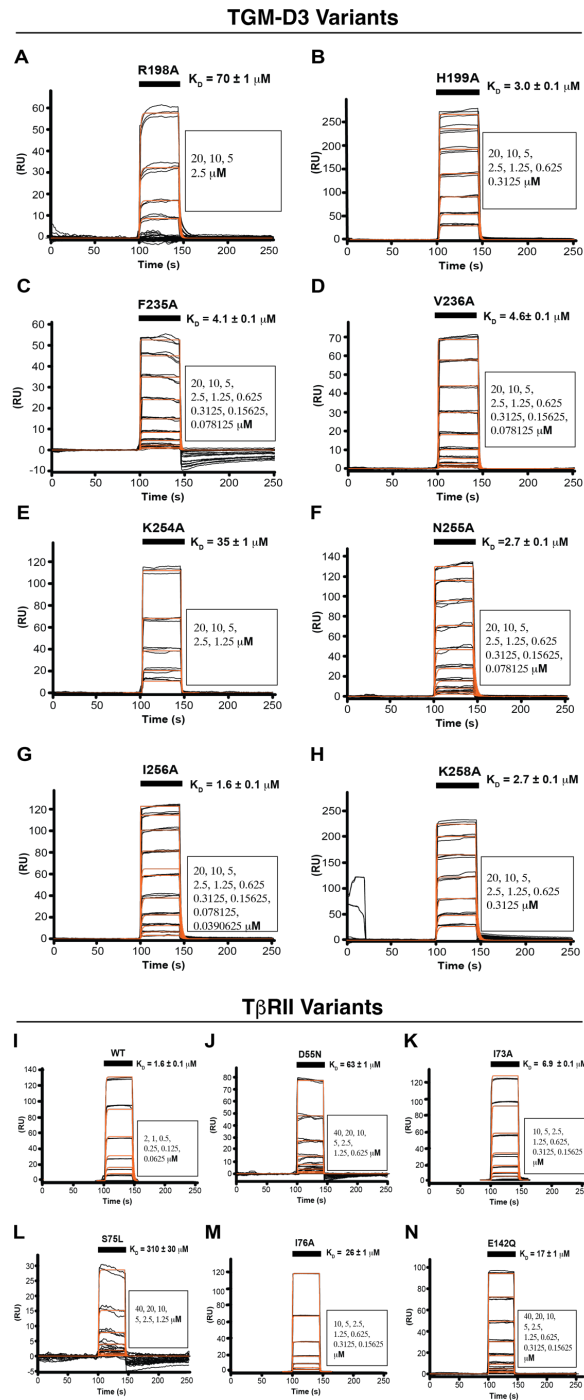

Supplement: mmc1.pdf [file mmc1.pdf]
